# Supplementary material
Source: MDPI journal article supplement (https://www.mdpi.com/2071-1050/14/18/11317)
Supplement: s1 [file s1]

Table S1. Assessment of the studied housing estates and housing estate greenery in terms of increasing the resilience of Wrocław. The green boxes correspond to increased resilience; the orange boxes correspond to reduced resilience; the grey ones indicate no change. The results were added up for each housing estate.

| Housing estate No. | Addre                                                                             | Decision No. | Urban sprawl* | Spatial planning ** | Floods*** | Pro-ecological solutions**** | Greenery                           |                       |                                  | Final impact on the city's resilience*<br>***** |
|--------------------|-----------------------------------------------------------------------------------|--------------|---------------|---------------------|-----------|------------------------------|------------------------------------|-----------------------|----------------------------------|-------------------------------------------------|
|                    |                                                                                   |              |               |                     |           |                              | vegetation clearance rate [%]***** | number of trees ***** | change in NDVI (2015–2020) ***** |                                                 |
| 1                  | Żwirki i Wigury 1- 11                                                             | 15/10        | -             | +                   | 0         | -                            | 0                                  | -                     | 0                                | -                                               |
| 2                  | Jurija Gagarina 40-44, 62-66                                                      | 249/10       | -             | -                   | 0         | +                            | +                                  | -                     | 0                                | -                                               |
| 3                  | Wejherowska 43, 45                                                                | 339/10       | 0             | -                   | 0         | -                            | 0                                  | 0                     | +                                | -                                               |
| 4                  | Borowska 242 a-b, 246 a-e                                                         | 616/10       | 0             | -                   | 0         | -                            | 0                                  | 0                     | 0                                | -                                               |
| 5                  | Augustowska 75-79                                                                 | 715/10       | 0             | +                   | 0         | -                            | +                                  | +                     | 0                                | +                                               |
| 6                  | Ułańska 28-28b                                                                    | 974/10       | -             | +                   | 0         | +                            | 0                                  | -                     | 0                                | 0                                               |
| 7                  | Zatorska 108a - Zatorska 60-64b                                                   | 1070/10      | -             | +                   | 0         | -                            | +                                  | +                     | 0                                | +                                               |
| 8                  | Jutrzenki 19,19a,19b, Dożynkowa 15,17,19                                          | 1307/10      | -             | +                   | 0         | -                            | -                                  | +                     | 0                                | -                                               |
| 9                  | Złotnicka 12 - 16                                                                 | 1376/10      | 0             | +                   | 0         | +                            | +                                  | 0                     | 0                                | +                                               |
| 10                 | Rymarska 43-47                                                                    | 1535/10      | 0             | +                   | 0         | -                            | +                                  | +                     | 0                                | +                                               |
| 11                 | Kminkowa 30-32 - Szałwiowa 33, Waniliowa 16-24, Szałwiowa 15-25, Cynamonowa 15-17 | 1561/10      | -             | +                   | 0         | -                            | 0                                  | +                     | 0                                | 0                                               |
| 12                 | Wietrzna 109a - 109g                                                              | 1614/10      | 0             | +                   | 0         | -                            | -                                  | 0                     | 0                                | -                                               |
| 13                 | Królewiecka 31-121                                                                | 1853/10      | 0             | +                   | 0         | -                            | 0                                  | +                     | 0                                | +                                               |
| 14                 | Semaforowa 28-40a                                                                 | 2171/10      | -             | +                   | 0         | -                            | 0                                  | -                     | 0                                | -                                               |
| 15                 | Stabłowicka 98-                                                                   | 2229/10      | 0             | +                   | -         | +                            | -                                  | +                     | 0                                | +                                               |

|    |                                                                                |         |   |   |   |   |   |   |   |   |
|----|--------------------------------------------------------------------------------|---------|---|---|---|---|---|---|---|---|
| 16 | ks. C. Klimasa 37-49, Międzyzleska 1-3g                                        | 172/10  | 0 | - | 0 | + | + | + | + | + |
| 17 | R. Wojaczka 3-21                                                               | 2511/10 | 0 | + | 0 | + | + | + | 0 | + |
| 18 | Wambierzycka 14-24 i 2-12                                                      | 2530/10 | 0 | - | 0 | - | 0 | 0 | + | - |
| 19 | Suwalska 14-18                                                                 | 2716/10 | 0 | + | 0 | - | + | 0 | + | + |
| 20 | Agrestowa 137-145                                                              | 2719/10 | - | + | 0 | - | + | + | 0 | + |
| 21 | Krzycka 71-71d                                                                 | 50/11   | 0 | + | 0 | - | 0 | + | 0 | + |
| 22 | Zatorska 92 - 108, 62-66, 110 – 126                                            | 145/11  | - | + | 0 | - | + | + | + | + |
| 23 | Piękna 5-19                                                                    | 14/11   | 0 | - | 0 | + | 0 | + | 0 | + |
| 24 | J. Matejki 2-2e, H. Sienkiewicza 34a                                           | 230/11  | 0 | + | 0 | + | - | + | + | + |
| 25 | Raławicka 71-97                                                                | 20/11   | 0 | + | 0 | + | 0 | 0 | 0 | + |
| 26 | Asfaltowa 1-9                                                                  | 362/11  | 0 | + | 0 | - | 0 | + | 0 | + |
| 27 | Raławicka 105-107, ul. Rymarska 50-50c                                         | 465/11  | 0 | + | 0 | - | 0 | + | 0 | + |
| 28 | Zatorska 61-61a                                                                | 655/11  | - | + | 0 | + | + | - | + | + |
| 29 | Górecka 8-16                                                                   | 698/11  | 0 | + | 0 | + | - | - | 0 | 0 |
| 30 | Ułańska 32-46                                                                  | 705/11  | - | + | 0 | - | 0 | 0 | 0 | - |
| 31 | gen. T. Kościuszki 95-117, gen. H. Dąbrowskiego, 30-36a, gen. K. Pułaskiego 67 | 719/11  | 0 | + | 0 | + | 0 | + | + | + |
| 32 | Stanisławowska 50-50b                                                          | 155/11  | 0 | + | 0 | - | 0 | 0 | + | + |
| 33 | Poświęcka 51-55                                                                | 401/11  | 0 | + | 0 | + | + | + | + | + |
| 34 | gen. R. Traugutta 72-78 Walońska 15-19                                         | 899/11  | 0 | + | 0 | + | + | + | 0 | + |
| 35 | Ułańska 66-68                                                                  | 422/11  | - | + | 0 | - | + | - | + | 0 |
| 36 | Brylantowa 16-22                                                               | 528/11  | - | + | 0 | + | + | - | + | + |

|    |                                                                                                |         |   |   |   |   |   |   |   |   |
|----|------------------------------------------------------------------------------------------------|---------|---|---|---|---|---|---|---|---|
| 37 | Przyjaźni 52-64a<br>Rodzinna 23-23c                                                            | 528/11  | - | + | 0 | + | - | + | 0 | + |
| 38 | Przedświt 9b-d                                                                                 | 750/11  | 0 | + | 0 | - | + | 0 | + | + |
| 39 | H. M.<br>Kamieńskiego<br>207-229a                                                              | 1795/11 | 0 | + | 0 | - | 0 | + | 0 | + |
| 40 | Maślicka 173-177g                                                                              | 1909/11 | 0 | + | 0 | - | 0 | 0 | 0 | 0 |
| 41 | Oliwkowa nr 5-21,<br>Daktyłowa 7-11                                                            | 2357/11 | 0 | + | 0 | - | + | + | 0 | + |
| 42 | J. Iwaszkiewicza<br>2-18                                                                       | 2402/11 | - | + | 0 | + | + | + | 0 | + |
| 43 | Potokowa 27-35e                                                                                | 2415/11 | 0 | + | 0 | - | - | + | + | + |
| 44 | Ubocze 15-19                                                                                   | 2493/11 | - | - | 0 | - | + | 0 | 0 | - |
| 45 | Mączna 1                                                                                       | 2493/11 | 0 | - | 0 | - | - | + | 0 | - |
| 46 | Zefirowa 17 - 21,<br>Burzowa 4 -10                                                             | 3242/11 | 0 | + | 0 | - | 0 | + | 0 | + |
| 47 | Pakistańska 5-11,<br>ul. Wietnamska 3,<br>I. Mościckiego<br>42a-42c,<br>Birmańska 1            | 3290/11 | - | + | 0 | - | - | + | - | - |
| 48 | Bajana Jerzego<br>24b, Bulwar<br>Dedała 1 -<br>22a,24,26,32,34,<br>Drzewieckiego<br>Stefana 36 | 3447/11 | 0 | + | 0 | + | 0 | + | + | + |
| 49 | A. Słomińskiego<br>3-3j, Zakładowa<br>11h-y                                                    | 3511/11 | 0 | + | 0 | - | 0 | + | + | + |
| 50 | M.Polo 9 - 47b, K.<br>Kolumba 3 - 9d, F.<br>Magellana 11 - 55                                  | 3822/11 | 0 | + | 0 | + | - | + | + | + |
| 51 | Zagrodnicza 17-25                                                                              | 4091/11 | 0 | - | 0 | - | - | + | 0 | - |
| 52 | Sołtysowicka 32 a-<br>d                                                                        | 61/12   | 0 | + | 0 | - | + | + | 0 | + |
| 53 | Cynamonowa 16-<br>30, Bazyliowa 14-<br>16d                                                     | 204/12  | - | + | 0 | + | + | - | + | + |
| 54 | Rakowiecka 23-25,                                                                              | 339/12  | 0 | - | 0 | - | + | + | + | + |

Okólna 4-8

|    |                                                          |         |   |   |   |   |   |   |   |   |
|----|----------------------------------------------------------|---------|---|---|---|---|---|---|---|---|
| 55 | Opoczyńska 13,<br>14, 15                                 | 909/12  | 0 | + | 0 | - | + | - | 0 | 0 |
| 56 | Kłodzka 4-38                                             | 1262/12 | 0 | + | 0 | + | 0 | + | - | + |
| 57 | Skarbowców 84-<br>84a, Mgiłsta 16-20                     | 1360/12 | 0 | + | 0 | + | - | + | - | + |
| 58 | Skarbowców 78-<br>82d, Babiego Łata<br>9-19b             | 1566/12 | - | + | 0 | - | 0 | 0 | + | 0 |
| 59 | Gorlicka 54-58e,                                         | 2100/12 | 0 | + | 0 | - | 0 | 0 | 0 | 0 |
| 60 | al. Śliwowa 46-48                                        | 2673/12 | 0 | + | 0 | - | + | - | + | + |
| 61 | Waniliowa 36-42,<br>Kminkowa 45-<br>51a,                 | 3520/12 | - | + | 0 | - | + | + | + | + |
| 62 | al. Hallera Józefa,<br>gen. 78-98 (bud<br>A2 - III etap) | 3626/12 | 0 | - | 0 | + | 0 | + | 0 | + |
| 63 | Kamieńskiego<br>263-273                                  | 4533/12 | - | + | - | - | + | + | 0 | 0 |
| 64 | Zatorska 67-73                                           | 5621/12 | - | + | 0 | - | + | + | + | + |
| 65 | Wałbrzyska 1-3                                           | 5871/12 | - | + | 0 | - | 0 | + | + | + |
| 66 | Przyjaźni 101-105a                                       | 6567/12 | 0 | + | 0 | - | 0 | + | + | + |

\*Location:

- in the buffer zone 1 km from the city boundaries,

~ outside the buffer zone.

\*\* LDPI:

- No LDP in force

+ LDP in force

\*\*\* Floods - location:

- on floodplain

~ other

\*\*\*\* Proecological solutions:

- none

+ green roofs, fountains, ponds

\*\*\*\*\* vegetation clearance rate [%]

+ 0

~ for  $x \in (0, 15)$

- for  $x \geq 15$

\*\*\*\*\* number of trees:

- 0

~ for  $x \leq 10$

+ for  $x > 10$

\*\*\*\*\* change in NDVI (2015–2020):

+ increase

~ neutral

- decrease

\*\*\*\*\*The sum of values in the row.
